# Supplementary material for: Integrative analysis of transcriptome and single-cell sequencing combined with experimental validation identifies biomarkers associated with T cell and senescence in sepsis
Source: Research Square preprint supplement (doi:10.21203/rs.3.rs-8343291/v1), 2026-01-09
Supplement: Supplementary file 1 [file 706038914d7b951c50e04c8a.docx]

**Supplementary Information**

**
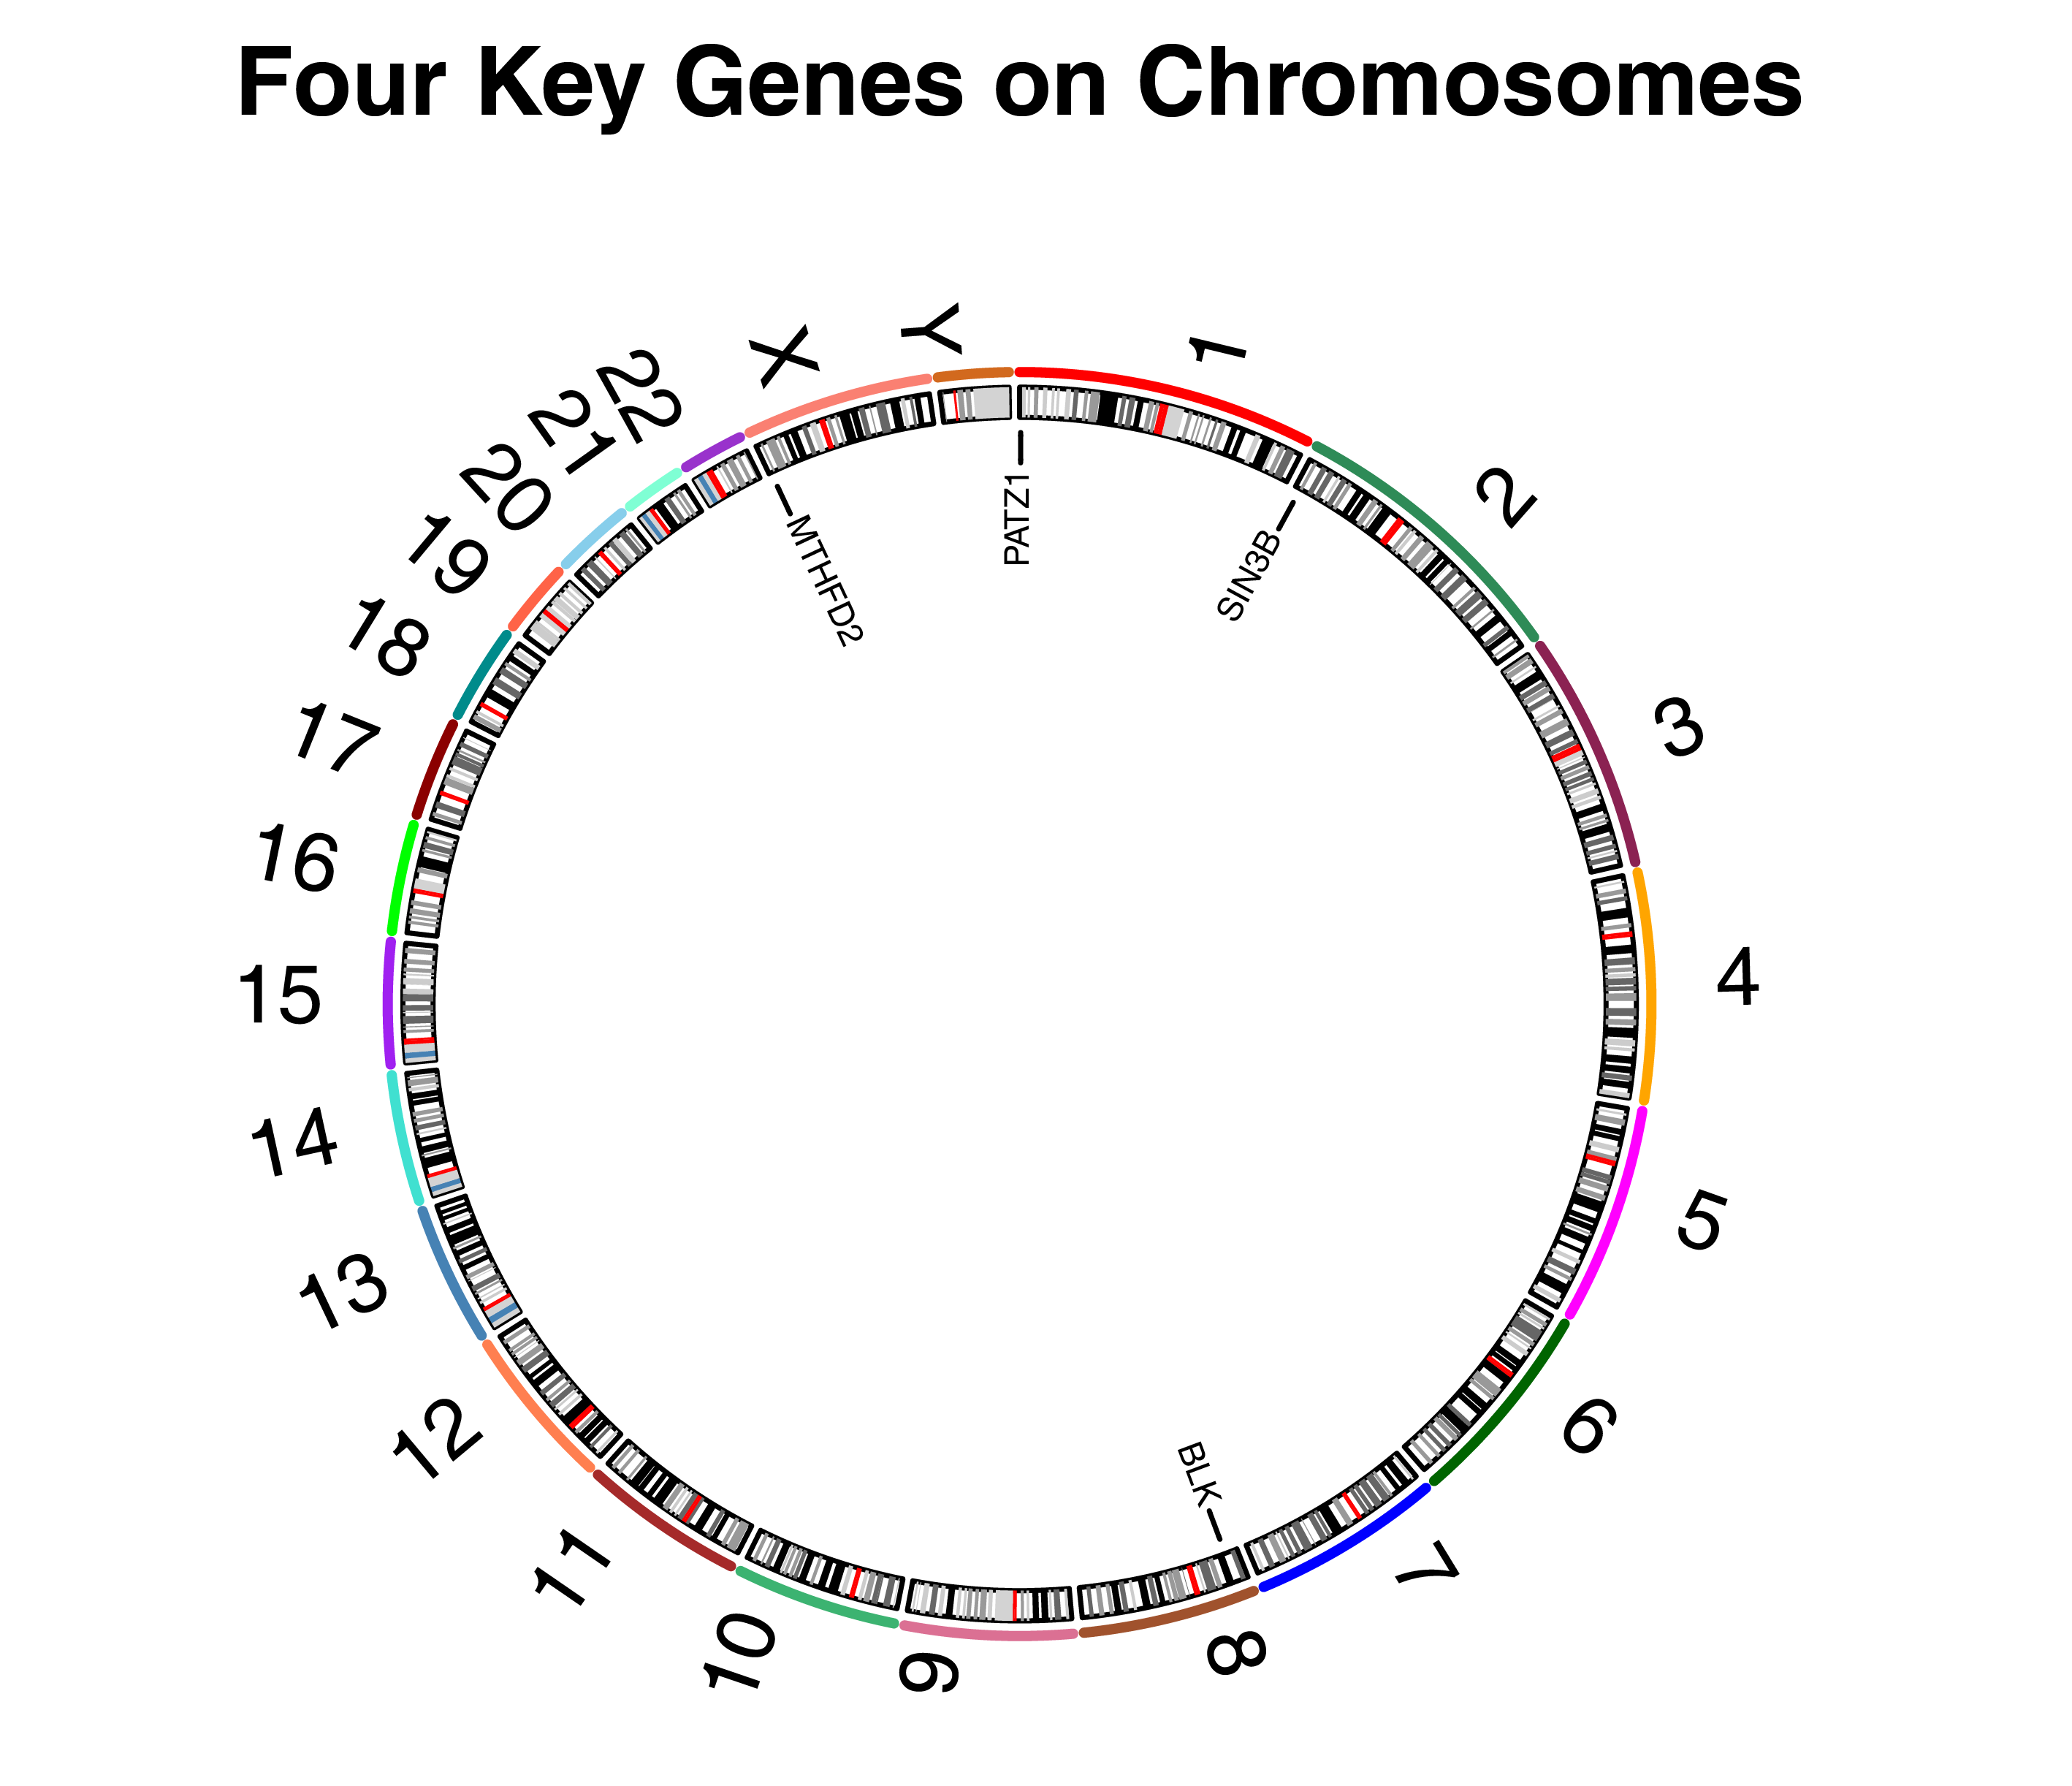
**

**Supplementary Fig. S1. Chromosomal localization of four biomarkers. (A)** Illustrates the chromosomal localizations of four candidate biomarkers: MTHFD2 is mapped to chromosome X, PATZ1 to chromosome 1, SIN3B to chromosome 2, and BLK to chromosome 8.

**Supplementary Table S1. List of senescence-related genes from CellAge.**

**Supplementary Table S2: GO enrichment of candidate genes**

**Supplementary Table S3: KEGG pathway enrichment results**

**Supplementary Table S4: SIN3B enriched pathway.**

**Supplementary Table S5: BLK enriched pathways.**

**Supplementary Table S6: PATZ1 enriched pathways.**

**Supplementary Table S7: MTHFD2 enriched pathways.**

**Supplementary Table S8: Immune cell correlation matrix.**

**Supplementary Table S9: PATZ1 correlation with immune cells.**
